# Supplementary material for: Universal DNA methylation age across mammalian tissues
Source: bioRxiv or medRxiv preprint supplement (doi:10.1101/2021.01.18.426733), 2022-09-05

## **Extended Data Figures and Tables**

for the article entitled "Universal DNA methylation age across mammalian tissues"

*AT Lu et al.*

**Extended Data Figure 1. Meta analysis of chronological age in mammalian samples across specific tissue types.**

Meta-analysis p-value ( $-\log_{10}$  transformed) versus chromosomal location (x-axis) according to human genome assembly 38 (Hg38) in a, brain tissues (across multiple regions), b, cerebral cortex in bottom, c, blood, d, liver, e, muscle and f, skin tissues. The upper and lower panels of the Manhattan plot depict CpGs that gain/lose methylation with age. In panel a, P values were calculated via two-stage meta-analysis that combined EWAS results across strata formed by species/brain-tissue (with  $n \geq 15$  samples). CpGs are colored in red and blue if they exhibit highly significant positive and negative age correlations according to  $P < 1.0 \times 10^{-40}$ ,  $1.0 \times 10^{-30}$ ,  $1.0 \times 10^{-220}$ ,  $1.0 \times 10^{-50}$ ,  $1.0 \times 10^{-20}$  and  $1.0 \times 10^{-140}$  for a-f, respectively. Red lines denote Bonferroni correction. Gene names are annotated for the top 20 CpGs with positive and negative associations, respectively. CpG-gene names are annotated for the best CpG with positive/negative association; additionally, cg12841266 and cg11084334 in LHFPL4 and cg09710440 in LHFPL3 are marked in purple and diamond shape.

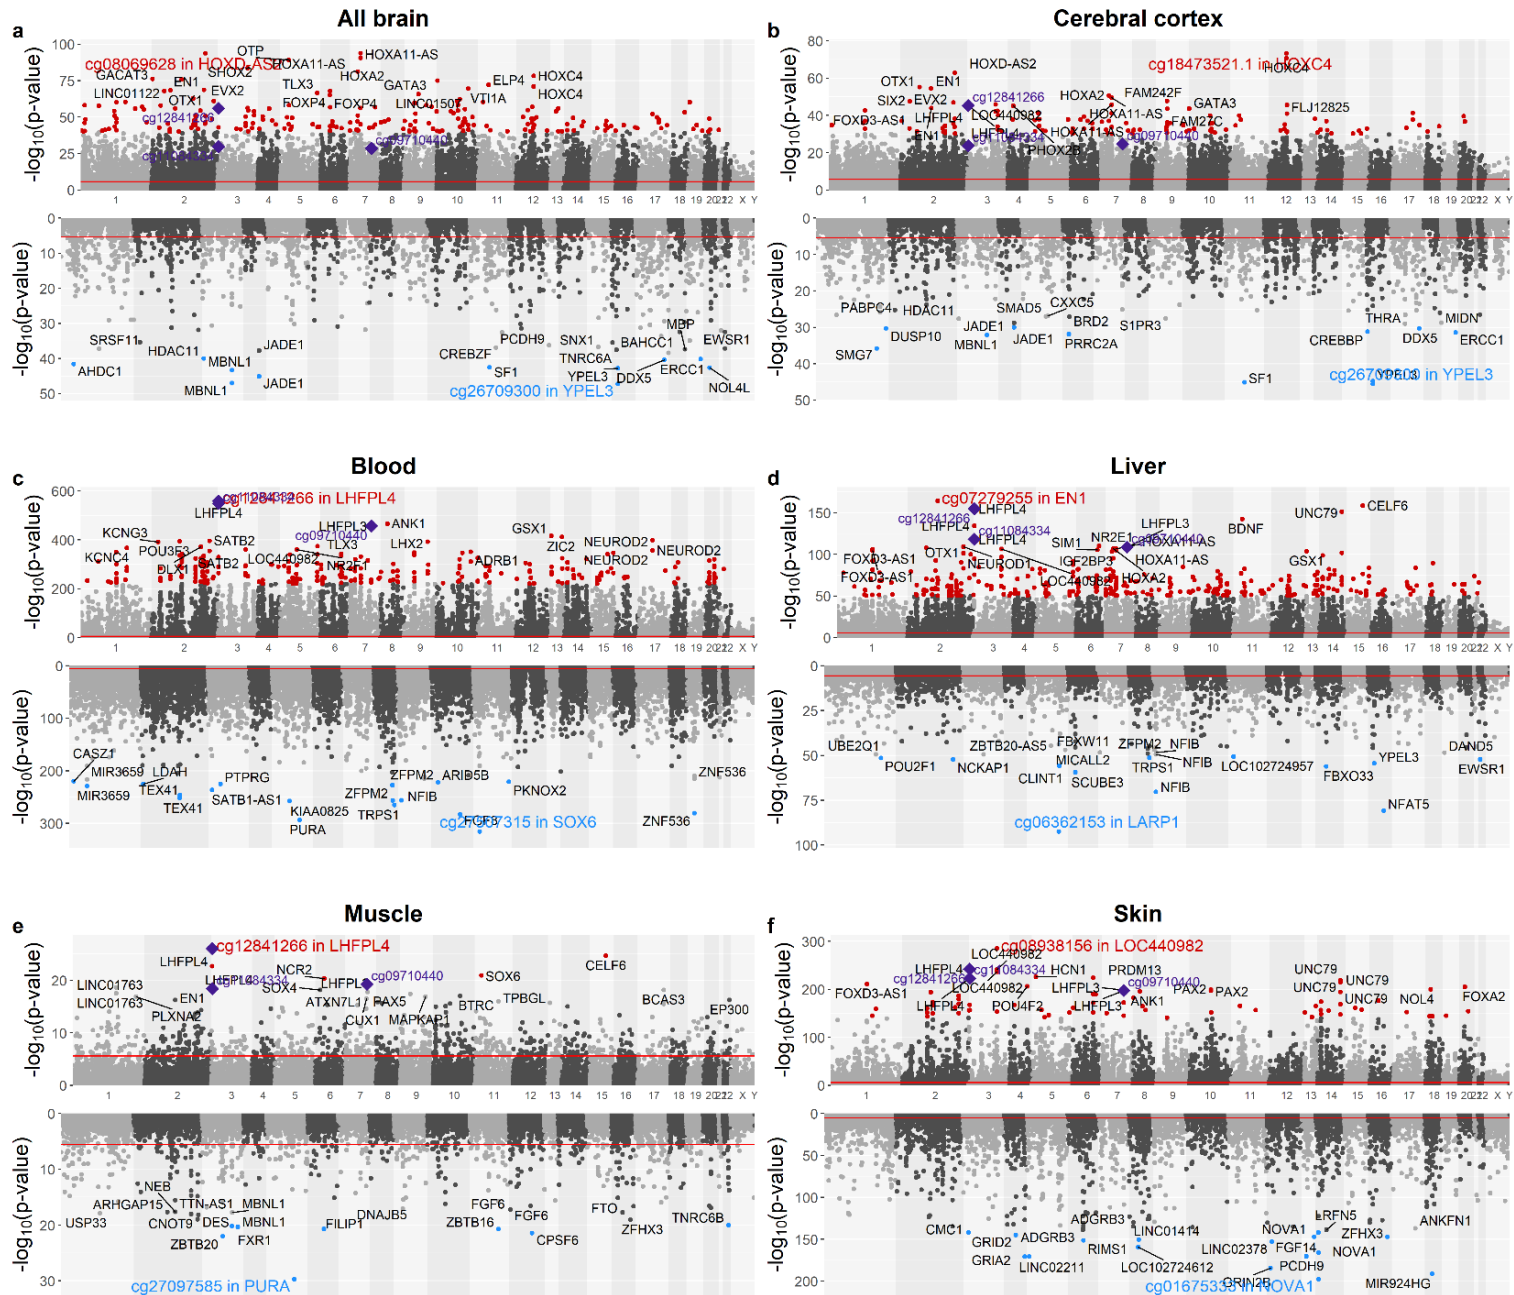

**Extended Data Figure 2. Association between methylation levels in LHFPL4 cg12841266 and chronological age in and after development stage across mouse tissues.**

Pearson correlation coefficients and P values are listed in titles. Mouse tissues are grouped into development stage, before sexual maturity, **a-g** (n=105) and post-development stage, after sexual maturity, **h-m** (n=1514). The mean±SD [range] of age is 3.5±1.7 [1.0, 6.0] weeks in the development group and 1.10±0.72 [0.15, 2.78] years in the post-development group. **a,h**, correlation between age (in units of year) and methylation levels of LHFPL4 cg12841266, in development and post-development stage, respectively. Each sample is marked by its tissue name and tissue-specific color. **b-g** display age-related methylation of cg12841266 in different tissues in the development (dev.) group. **i-l** display age-related methylation of cg12841266 in different tissues in the post-development group. Table m lists additional tissue types in the post-development group. P values are reported for sample size greater than 2.

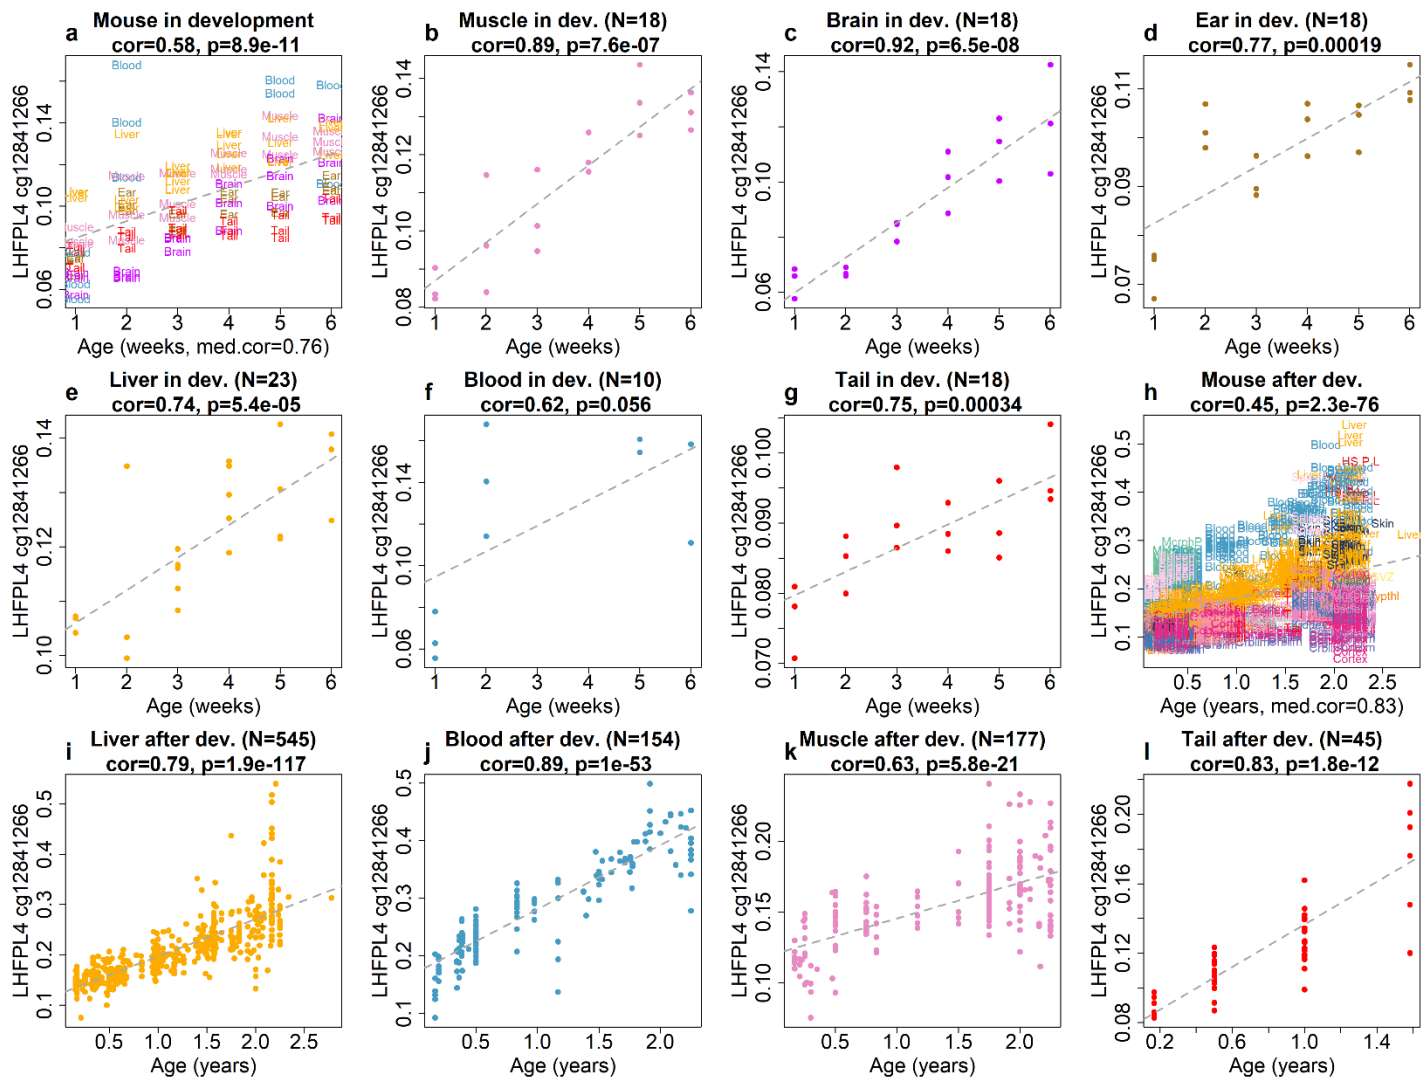

**m**

| Tissue               | N   | Cor  | P        |
|----------------------|-----|------|----------|
| Hypothalamus         | 2   | 1    | --       |
| Hemat.Prog.LSK       | 12  | 0.95 | 1.50E-06 |
| Spleen               | 31  | 0.94 | 4.70E-15 |
| Skin                 | 34  | 0.89 | 1.40E-12 |
| Kidney               | 45  | 0.88 | 1.20E-15 |
| SVZ                  | 8   | 0.88 | 4.10E-03 |
| Heart                | 89  | 0.85 | 1.30E-25 |
| Lung                 | 15  | 0.83 | 1.10E-04 |
| Cortex               | 151 | 0.52 | 5.30E-12 |
| Striatum             | 50  | 0.44 | 1.20E-03 |
| MacrophagePeritoneal | 42  | 0.39 | 1.00E-02 |
| Brain                | 19  | 0.38 | 1.10E-01 |
| Cerebellum           | 83  | 0.36 | 7.00E-04 |
| Fibroblast           | 12  | 0.21 | 5.20E-01 |

### Extended Data Figure 3. EWAS meta analysis of chronological age in mammalian samples stratified by age group.

Each axis reports a Z scores from two-stage EWAS meta-analysis of age across all species and tissues: young age (age < 1.5\* age at sexual maturity [ASM]), middle age (age between 1.5 and 3.5 ASM), or old age (age >= 3.5 ASM). Each dot corresponds to a CpG. Given by the product of Z scores in x and y-axis, the top 10 hypermethylated/hypomethylated CpGs are marked in pink/blue or especially marked in purple if they are located in LHFPL4/LHFPL3 genes. The Pearson correlation coefficient and corresponding nominal (unadjusted) two-sided correlation test p-value can be found in the title.

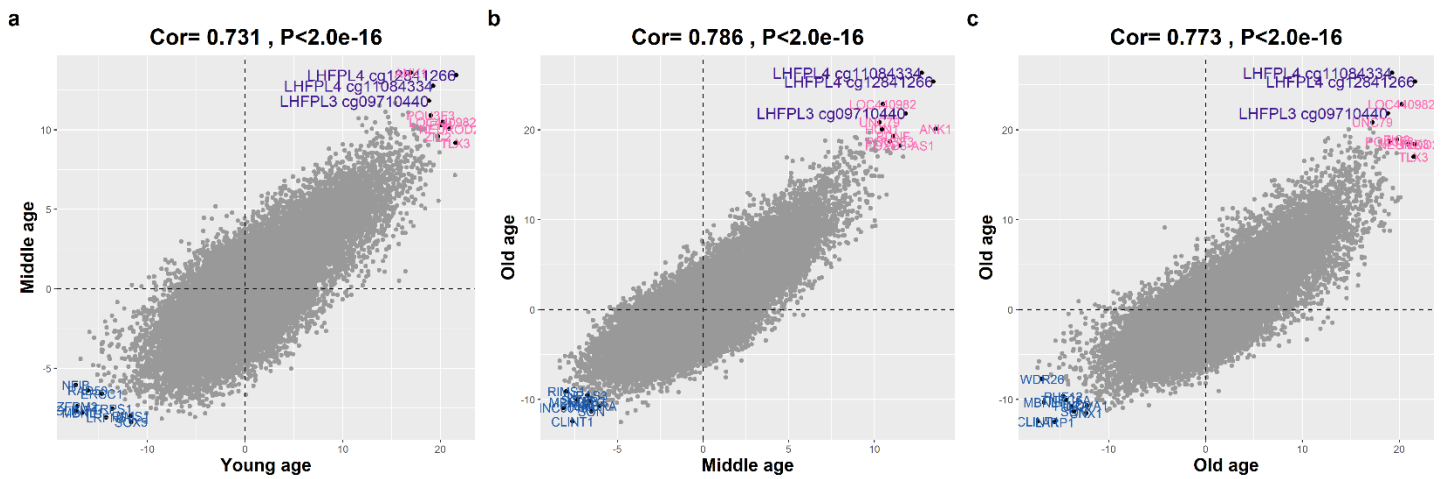

### Extended Data Figure 4. Universal clocks applied to GHRKO mouse experiment.

We applied clock 2 to mouse dataset (N=99 tissues) comprising two genotypes: growth hormone receptor/binding protein knockout (GHRKO, n=35) and wild type (WT, n=64). The mean±SD [range] of age is 0.66±0.06 [0.58, 0.79] years in the GHRKO group and is 0.59±0.09 [0.50, 0.79] years in the WT group. To measure epigenetic age acceleration we fit a regression model of DNAm age on chronological age and defined age acceleration (AgeAccel) as the resulting raw residual. Each panel depicts epigenetic age acceleration (y-axis) versus mouse genotypes. Each panel report test tissue type, sample size and the p-value of a non-parametric group comparison test (Kruskal-Wallis). The y-axis of the bar plots depicts the mean and one standard error. The numbers of individuals per genotype are reported as grey numbers in each bar. To combine the results across tissues, we applied Stouffer's method: meta p-value =  $2.82 \times 10^{-7}$  for the age acceleration from clock 2.

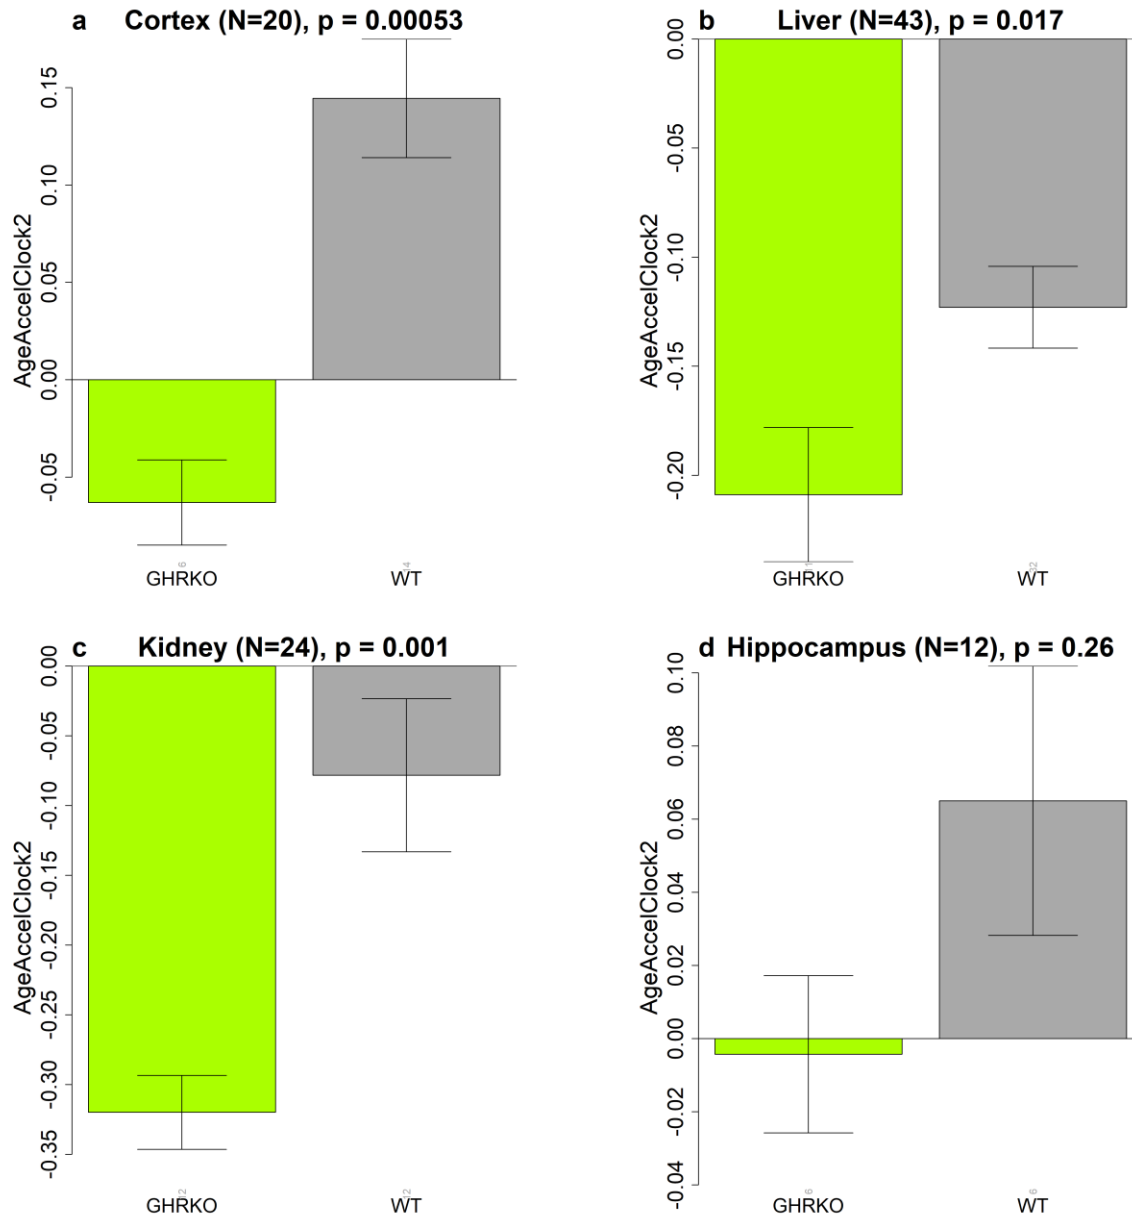

## Extended Data Table 1. The overlap of age-associated genes across different EWAS results.

For EWAS of age in brain, blood, muscle and skin, we identified a total of 51 overlapping CpGs across the top 1000 CpGs with positive age association. Analogously, we identified 3 overlapping CpGs with negative age association. We identified 33 unique genes proximal to the 51 hypermethylation CpGs and 3 genes proximal to the three hypomethylation CpGs. For genes with multiple overlapping CpGs, we report the CpG with the best P value across all tissues and ranked the genes accordingly. The table lists the columns: rank of the gene base on the EWAS meta P value from all tissues, HGNC gene symbol, the best CpG, protein domain, activity and function of gene expression.

| Rank                    | Gene      | CpG        | Protein domain                        | Activity                     | Function                             |
|-------------------------|-----------|------------|---------------------------------------|------------------------------|--------------------------------------|
| <b>Hypermethylation</b> |           |            |                                       |                              |                                      |
| 1                       | LHFPL4    | cg12841266 | Tetraspan transmembrane               | Clustering of GABA receptors | Dev. of inhibitory synapse           |
| 2                       | LHFPL3    | cg09710440 | Tetraspan transmembrane               | Clustering of GABA receptors | Dev. of inhibitory synapse           |
| 3                       | TLX3      | cg26844246 | Homeobox                              | TF                           | Dev.                                 |
| 4                       | E VX2     | cg09227056 | Homeobox                              | TF                           | Limb Dev.                            |
| 5                       | NEUROD2   | cg03679521 | bHLH                                  | TF                           | Neural Dev.                          |
| 6                       | ZIC2      | cg15682828 | Zinc-finger                           | TF                           | Early Dev.                           |
| 7                       | CELF6     | cg23087015 | RNA recognition motif (RRM)           | RNA-binding                  | RNA processing                       |
| 8                       | PAX2      | cg01486146 | Paired box                            | TF                           | Early Dev.                           |
| 9                       | BDNF      | cg27201382 | neurotrophin family of growth factors |                              | Brain Dev.                           |
| 10                      | PAX5      | cg20766695 | Paired box                            | TF                           | Early Dev.                           |
| 11                      | NRN1      | cg16356803 | neuritin family                       |                              | Nervous System Dev.                  |
| 12                      | PRDM13    | cg05797975 | Zinc finger                           |                              | transcriptional regulation           |
| 13                      | OTP       | cg24352905 | Homeobox                              | TF                           | Dev./Cell fate specification         |
| 14                      | NEUROD1   | cg09942248 | bHLH                                  | TF                           | Beural Dev.                          |
| 15                      | SALL1     | cg13909487 | Zinc finger                           | TF                           | Stem cell regulation and Dev.        |
| 16                      | NR2E1     | cg27496468 |                                       | Nuclear receptor             | Retinal Dev.                         |
| 17                      | TBX18     | cg09817427 | T-Box                                 | TF                           | Stem Cell Differentiation            |
| 18                      | TWIST1    | cg20477718 | bHLH                                  | TF                           | Embryonic Dev.                       |
| 19                      | SIX2      | cg03557129 | Homeobox                              | TF                           | Limb & Eye Dev.                      |
| 20                      | TFAP2D    | cg26834803 |                                       | TF                           | Embryonic Dev.                       |
| 21                      | OBI1-AS1  | cg23985931 |                                       | Anti-sense RNA               |                                      |
| 22                      | NKX2-2    | cg16524928 | Homeobox                              | TF                           | Spinal cord Dev.                     |
| 23                      | PHOX2B    | cg13278722 | Homeobox                              | TF                           | Neural Dev.                          |
| 24                      | DBX1      | cg21452781 | Homeobox                              | TF                           | Internertonal Differentiation        |
| 25                      | POU3F1    | cg13193455 | Homeobox                              | TF                           | Neuronal Dev.                        |
| 26                      | OTX1      | cg03957108 | Homeobox                              | TF                           | Brain and sensory Dev.               |
| 27                      | ZIC5      | cg24255409 | Zinc finger                           | TF                           | Early Dev.                           |
| 28                      | LOC642366 | cg16744551 |                                       | Anti-sense RNA               |                                      |
| 29                      | VSX2      | cg10707128 | Homeobox                              | TF                           | Specification of sensory retina      |
| 30                      | TBR1      | cg04879029 | T-Box                                 | TF                           | Numerous Dev. processes              |
| 31                      | EGR3      | cg02040024 | Zinc finger                           | Transcription Regulator      | Numerous Dev. processes              |
| 32                      | POU3F2    | cg08921975 | Homeobox                              | TF                           | Neuron Dev.                          |
| 33                      | IRX1      | cg02926165 | Homeobox                              | TF                           | Pattern formation                    |
| <b>Hypomethylation</b>  |           |            |                                       |                              |                                      |
| 1                       | LARP1     | cg12880090 | mTORC1 downstream targets             | RNA-binding                  | Regulation of translation            |
| 2                       | SON       | cg24466972 |                                       | RNA-binding                  | RNA splicing                         |
| 3                       | SNX1      | cg27626343 | Phox (PX)                             | Endosomal protein            | Regulates expression of EGF receptor |

Dev=development; TF=transcriptional factor.

**Extended Data Table 2. Top results of GREAT enrichment analysis.** The table presents the top results of GREAT analysis of genes proximal to positive/negative age-related CpGs from EWAS across all tissues (All), brain, cortex, blood, liver, muscle and skin, respectively. Column 1 lists tissue type in EWAS. Columns 2-5 lists the name of top gene set and unadjusted hypergeometric P values. For MSigDB Perturbation based on the positive age-related genes, we report the results from BENPORATH\_ES\_WITH\_H3K27ME3, BENPORATH\_EED\_TARGETS and BENPORATH\_SUZ12\_TARGETS, respectively. For the other ontogenies, we report the most significant pathway/gene set, provided hypergeometric  $P < 0.001$ .



| Tissue                           | GO Biological Process                             | MSigDB Pathway                                 | MSigDB Perturbation                                                    | Mouse Phenotype                                               |
|----------------------------------|---------------------------------------------------|------------------------------------------------|------------------------------------------------------------------------|---------------------------------------------------------------|
| <b>Positive age-related CpGs</b> |                                                   |                                                |                                                                        |                                                               |
| All                              | nervous system development(P=3.7e-207)            | Reg. of gene exp. of beta cells (P= 4e-38)     | H3K27, Eed, Suz12 PRC2 targets.(P values=2.8e-266, 1.7e-262, 7.1e-225) | abnormal nervous system morphology(P=8e-199)                  |
| Brain                            | pattern specification process(P=3e-64)            | --                                             | H3K27, Eed, Suz12 PRC2 targets(P values=3.3e-68, 5.5e-64,8.7e-54)      | lethality during fetal growth through weaning(P=2e-45)        |
| Cortex                           | pattern specification process(P=3e-115)           | --                                             | H3K27, Eed, Suz12 PRC2 targets(P values=5.1e-116,3.5e-111,6.1e-87)     | abnormal skeleton morphology(P= 2e-75)                        |
| Blood                            | anatomical structure development(P=2e-249)        | Reg. of gene exp. of beta cells (P= 5e-30)     | H3K27, Eed, Suz12 PRC2 targets(P values=3.9e-283, 1.9e-294, 3.9 e-259) | abnormal nervous system morphology(P=2e-231)                  |
| Liver                            | anatomical structure development(P=1e-157)        | --                                             | H3K27, Eed, Suz12 PRC2 targets(P values =3.3e-189, 4.9e-190, 1.7e-149) | nervous system phenotype(P=1e-139)                            |
| Muscle                           | central nervous system development(P=7e-17)       | --                                             | H3K27, Eed, Suz12 PRC2 targets(P values =8.7e-18, 1.4e-17, 8.2 e-16)   | abnormal midbrain morphology(P=6e-13)                         |
| Skin                             | nervous system development(P=5.4e-141)            | Maturity onset diabetes of the young(P= 3e-38) | H3K27, Eed, Suz12 PRC2 targets(P values =3.3e-189, 6.2e-191, 2.6e-150) | nervous system phenotype(P=1e-144)                            |
| <b>Negative age-related CpGs</b> |                                                   |                                                |                                                                        |                                                               |
| All                              | --                                                | --                                             | --                                                                     | --                                                            |
| Brain                            | RNA splicing (P=6e-42)                            | Circadian rhythm – mammal (P=9e-18)            | Genes up-regulated in Alzheimer's disease. (P=2.1e-30)*                | increased circulating glucagon level (P=3e-18)                |
| Cortex                           | RNA processing (P= 5e-34)                         | Circadian rhythm – mammal (P= 4e-19)           | Genes related to number of oligodendrocytes (P= 5.9e-22)               | increased circulating glucagon level (P= 3e-17)               |
| Blood                            | anterior compartment pattern formation (P= 3e-08) | --                                             | Gene set associated with MLL fusions (P= 1e-09)                        | improved righting response (P= 2e-06)                         |
| Liver                            | lung ciliated cell differentiation (P= 4e-10)     | --                                             | Genes up-regulated under low serum(P= 2e-08)                           | absent lung saccules (P= 4e-10)                               |
| Muscle                           | cellular component assembly (P=3e-15)             | --                                             | Genes up-regulated in TLX KO neural stem cells(P=1e-28)                | increased variability of skeletal muscle fiber size (P=6e-22) |
| Skin                             | --                                                | --                                             | --                                                                     | abnormal circulating alanine transaminase level (P= 2e-06)    |

-- denotes not available.

\* ID of the gene set is BLALOCK\_ALZHEIMERS\_DISEASE\_UP. The results of BLALOCK\_ALZHEIMERS\_DISEASE\_UP for other tissues are listed in Supplementary Table 5.2 (all tissues), 5.7 (cortex), 5.8 (blood) and 5.13 (muscle).

**Extended Data Table 3 Select gene sets from GREAT enrichment analysis.** Results from the GREAT enrichment analysis of top (+/-) 1,000 age-related CpGs in all tissues (All), brain, blood, cortex, liver, muscle and skin EWAS. The top panel highlights the results related to mitochondrial gene sets from GO Cellular component ontology. The lower panel highlights the gene sets from HGNC Gene Families ontology – gene sets based on sequence similarity. Columns 1 to 4 lists EWAS tissue type, sign of age-related CpGs, gene set ID, and hypergeometric P value. Column 5 lists the overlapping genes between the genes proximal to the 1,000 age-related CpGs and the genes in the corresponding test gene set. Abbreviations: mit.ATP denotes mitochondrial proton-transporting ATP synthase complex (mit.ATP) and mit.part denotes mitochondrial part.

| <b>Mitochondrial</b>      |             |           |          |                                                                                                                                                                                                           |
|---------------------------|-------------|-----------|----------|-----------------------------------------------------------------------------------------------------------------------------------------------------------------------------------------------------------|
| <b>Tissue</b>             | <b>Sign</b> | <b>ID</b> | <b>P</b> | <b>Overlap gene</b>                                                                                                                                                                                       |
| All                       | +           | mit.ATP   | 4.56E-10 | ATP5EP2,ATP5G2                                                                                                                                                                                            |
| Blood                     | +           | mit.ATP   | 3.24E-11 | ATP5EP2,ATP5G2                                                                                                                                                                                            |
| Brain                     | -           | mit.part  | 2.20E-08 | ATP5G2,ATP5L,BAD,BCL2L1,BMF,CHPF,CNP,COQ3,COX20,CSDE1,DDX3X,ERAL1,GK2,1DH3A,KIAA1967,MALSU1,MAPK8IP1,MFN2,NDUFB11,NFS1,PI4KB,PINK1,PLSCR3,POLG2,PPOX,RAB11FIP5,SFXN5,SLC25A36,TIMM10B,TMEM126A,TUFM,USMG5 |
| Cortex                    | -           | mit.part  | 3.40E-06 | ATP5A1,BCL2L1,CHPF,COQ3,ERAL1,GRSF1,IDH3A,KIAA1967,MALSU1,NFS1,PCCB,POLG2,TUFM                                                                                                                            |
| <b>HGNC Gene Families</b> |             |           |          |                                                                                                                                                                                                           |
| All                       | +           | NKL       | 2.4E-49  | BARHL1,BARHL2,DBX1,DLX1,DLX2,DLX6,EN1,EN2,HMX2,LBX1,MSX1,NKX2-1,NKX2-2,NKX2-5,NKX2-8,NKX3-2,TLX1,TLX3,VAX1                                                                                                |
|                           | +           | PRD       | 1.1E-34  | DMBX1,DRGX,OTP,OTX1,OTX2,PHOX2B,PITX2,PRRX1,SHOX2,UNCX,VSX2                                                                                                                                               |
|                           | +           | FOX       | 3.50E-18 | FOXA1,FOXA2,FOXB1,FOXD2,FOXD3,FOXG1,FOXQ1                                                                                                                                                                 |
| Brain                     | +           | PRD       | 2.00E-18 | DMBX1,DRGX,OTP,OTX1,PHOX2B,PITX2,SHOX2,UNCX,VSX2                                                                                                                                                          |
|                           | +           | NKL       | 2.80E-14 | BARHL1,DBX1,DLX1,DLX2,DLX5,DLX6,EMX1,EMX2,EN1,HHEX,HMX3,LBX1,MSX1,NKX2-1,NKX2-2,NKX3-2,NKX6-3,TLX3                                                                                                        |
| Cortex                    | +           | FOX       | 1.50E-13 | FOXA1,FOXA2,FOXD3,FOXG1,FOXL1,FOXN1,FOXO6,FOXP2,FOXP4                                                                                                                                                     |
|                           | +           | PRD       | 1.70E-36 | DMBX1,DRGX,OTP,OTX1,PHOX2B,PITX2,SHOX2,UNCX,VSX2                                                                                                                                                          |
|                           | +           | NKL       | 7.00E-21 | BARHL2,DBX1,DLX1,DLX2,DLX5,DLX6,EN1,HMX3,LBX1,MSX1,NKX2-1,NKX2-2,NKX3-2,TLX3                                                                                                                              |
| Blood                     | +           | FOX       | 1.40E-16 | FOXA1,FOXA2,FOXB1,FOXC1,FOXD2,FOXD3,FOXG1,FOXL1,FOXO6,FOXP2,FOXP4,FOXQ1                                                                                                                                   |
|                           | +           | NKL       | 5.70E-74 | BARHL1,BARHL2,DBX1,DLX1,DLX2,DLX5,DLX6,EMX2,EN1,EN2,HMX2,LBX1,MSX1,NKX2-1,NKX2-2,NKX2-5,NKX2-8,NKX3-2,TLX1,TLX3,VAX1                                                                                      |
| Liver                     | +           | PRD       | 4.70E-45 | DMBX1,DRGX,OTP,OTX1,OTX2,PHOX2B,PITX1,PITX2,PRRX1,SHOX2,UNCX,VSX2                                                                                                                                         |
|                           | +           | FOX       | 3.50E-18 | FOXA1,FOXA2,FOXB1,FOXD2,FOXD3,FOXF2,FOXG1,FOXP4,FOXQ1                                                                                                                                                     |
|                           | +           | NKL       | 1.40E-45 | BARHL1,BARHL2,DBX1,DLX1,DLX2,DLX5,DLX6,EMX2,EN1,EN2,HMX3,LBX1,MSX1,NKX2-1,NKX2-2,NKX2-3,TLX1,TLX3,VAX1                                                                                                    |
| Muscle                    | +           | PRD       | 1.40E-10 | DMBX1,OTP,OTX1,PHOX2B,PITX2,PRRX1,SHOX2,UNCX,VSX2                                                                                                                                                         |
|                           | +           | NKL       | 1.20E-04 | DMBX1,OTP,OTX1,PHOX2B,PITX2,UNCX,VSX2                                                                                                                                                                     |
| Skin                      | +           | NKL       | 2.10E-04 | BARHL2,DBX1,DLX1,DLX2,DLX6,EMX1,EMX2,EN1,EN2,HMX3,LBX1,NKX2-1,NKX2-2,TLX3                                                                                                                                 |
|                           | +           | NKL       | 5.00E-26 | BARHL1,BARHL2,DBX1,DLX6,EN1,EN2,HHEX,HMX2,LBX1,MSX1,NKX2-1,NKX2-2,NKX2-8,NKX6-1,TLX1,TLX3,VAX1                                                                                                            |
|                           | +           | PRD       | 1.70E-24 | DMBX1,DRGX,OTP,OTX1,OTX2,PHOX2B,PITX2,PRRX1,UNCX,VSX2                                                                                                                                                     |
| Brain                     | +           | FOX       | 5.30E-19 | FOXA1,FOXA2,FOXB1,FOXD3,FOXG1                                                                                                                                                                             |
|                           | -           | RBM       | 6.50E-10 | CIRBP,CPEB2,CPEB4,CPSF6,DAZAP1,EWSR1,HNRNPA2B1,HNRNPC,HNRNPDL,HNRNP LL,PABPC4,PABPN1,PUF60,RBM39,SFPQ,SNRNP70,TRA2A,TRA2B,U2AF2                                                                           |
| Cortex                    | -           | ZC3H      | 8.00E-07 | MBNL1,ZC3H14                                                                                                                                                                                              |
|                           | -           | RBM       | 6.50E-10 | CIRBP,DAZAP1,EWSR1,GRSF1,HNRNPA2B1,HNRNPC,HNRNP LL,PABPC4,PUF60,RBM39,SFPQ,SNRNP70,TRA2A,TRA2B,U2AF2                                                                                                      |
| muscle                    | -           | RBM       | 6.30E-06 | CELFL1,CIRBP,CPEB2,CPEB4,CPSF6,DAZAP1,HNRNPC,HNRNPDL,PABPC4,RBM39,SPEN,TRA2B                                                                                                                              |
|                           | -           | ZC3H      | 1.00E-04 | MBNL1,ZC3H11A                                                                                                                                                                                             |

### Extended Data Figure 5 Enrichment analysis EWAS-GWAS associated genes.

The plot highlights the significant results from the genomic-region based enrichment analysis between (1) the top 5% genomic regions involve in GWAS of complex traits-associated genes and (2) the top 1000 hypermethylated/hypomethylated CpGs from EWAS of age-associated ages across all, blood, brain, cerebral cortex, liver, muscle, and skin tissues, respectively. We list the GWAS study (x-axis) if that at least one enrichment P value (columns) is significant at a nominal significance level of  $5.0 \times 10^{-4}$ . Cells are colored in grey if nominal  $P > 0.05$ . The heatmap color gradient is based on  $-\log_{10}$  (hypergeometric P value). The x-axis indicates whether the EWAS list for age is based on hypermethylation (hyper, positive correlation with age) or hypomethylation (hypo, negative correlation with age). The y-axis lists GWAS index number (listed in **Supplementary Info**), trait name. The color band next to the trait encodes the GWAS category. Abbreviations: All=All ancestries, HD=Huntington's disease, WC=waist circumference, WHR= waist to hip ratio, IBD=inflammatory bowel disease, EUR=European ancestry. FTD=frontal temporal dementia.

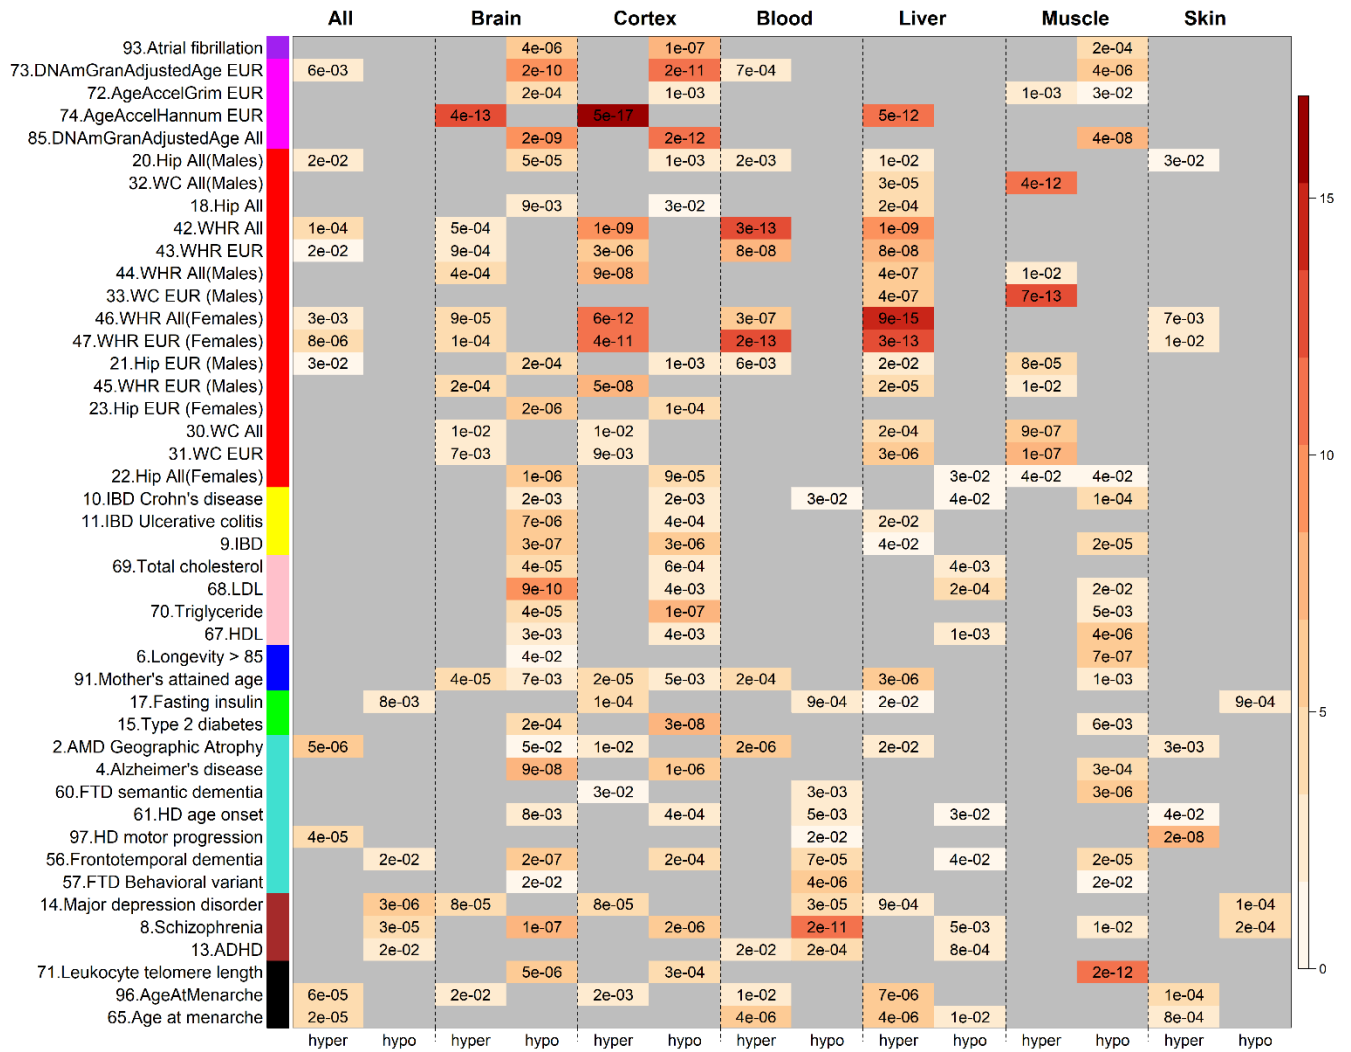

**GWAS category**

- Age related phenotype
- Behavioral phenotype
- DNAm biomarkers
- GIANT BMI & Height

- GIANT Body fat distribution
- Inflammatory diseases
- Lipid panel outcomes
- Longevity

- Metabolic outcomes and diseases
- Neurodegenerative disorder
- Neuropsychiatric disorder
- Reproductive aging

**Extended Data Table 4 Predictive accuracy of three universal mammalian clocks.**

The rows correspond to 3 universal clocks based on penalized regression models for I) log-transformed age, log(Age+2), II) relative age, and III) log-linear age. The inverse transformations were used to arrive at age estimates, DNA methylation age, in units of years. Each clock was evaluated two validation schemes: leave-one-fraction-out cross validation (LOFO) and leave-one-species-out cross validation (LOSO). Columns 3 and 4 report the Pearson correlation coefficient (Cor) and median absolute error (MAE, in units of years) across all samples, i.e. species and tissue type are being ignored. Columns 5 and 6 report the median value across species, i.e. median Cor (med.Cor) and median MAE (med.MAE), for species with at least 15 observations. Columns 7-9 repeated the analysis based on relative age scales except med.Cor, which is not changed by using relative age scale. In Clocks 1&3, DNAm relative age was computed based on formula (1) with the variable Age replaced by DNAm Age.

| Universal Clock                      | Validation scheme | DNAm Age vs age |       |          |          | DNAm relative age vs relative age |       |          |
|--------------------------------------|-------------------|-----------------|-------|----------|----------|-----------------------------------|-------|----------|
|                                      |                   | Cor             | MAE   | med. Cor | med. MAE | Cor                               | MAE   | med. MAE |
| <b>Clock 1:</b><br>Naïve, log(Age+2) | LOFO              | 0.964           | 0.768 | 0.909    | 0.919    | 0.899                             | 0.032 | 0.032    |
| <b>Clock 2:</b><br>RelativeAge       | LOFO              | 0.986           | 0.521 | 0.940    | 0.675    | 0.960                             | 0.020 | 0.022    |
| <b>Clock 3:</b><br>log-linear age    | LOFO              | 0.982           | 0.740 | 0.914    | 1.023    | 0.925                             | 0.03  | 0.033    |
| <b>Clock 1:</b><br>Naïve, log(Age+2) | LOSO              | 0.729           | 1.729 | 0.830    | 1.837    | 0.493                             | 0.084 | 0.058    |
| <b>Clock 2:</b><br>RelativeAge       | LOSO              | 0.939           | 1.416 | 0.893    | 1.217    | 0.757                             | 0.061 | 0.044    |
| <b>Clock 3:</b><br>log-linear age    | LOSO              | 0.920           | 1.822 | 0.883    | 1.912    | 0.682                             | 0.082 | 0.053    |

**Extended Data Figure 6 Universal clocks applied to species with fewer than 15 methylation samples.**

The title of each panel lists the type of universal clock: a, Clock 1=naïve universal clock based on  $\log(\text{Age}+2)$ , b,d, Clock 2=universal clock for relative age, c, Clock 3 =universal clock for log-linear age. Leave one folder out (LOFO) methylation estimates versus chronological age (a-c) or relative age (d). The respective inverse transformations were applied to arrive at DNA methylation-based estimates of chronological age in years or relative age (y-axis).

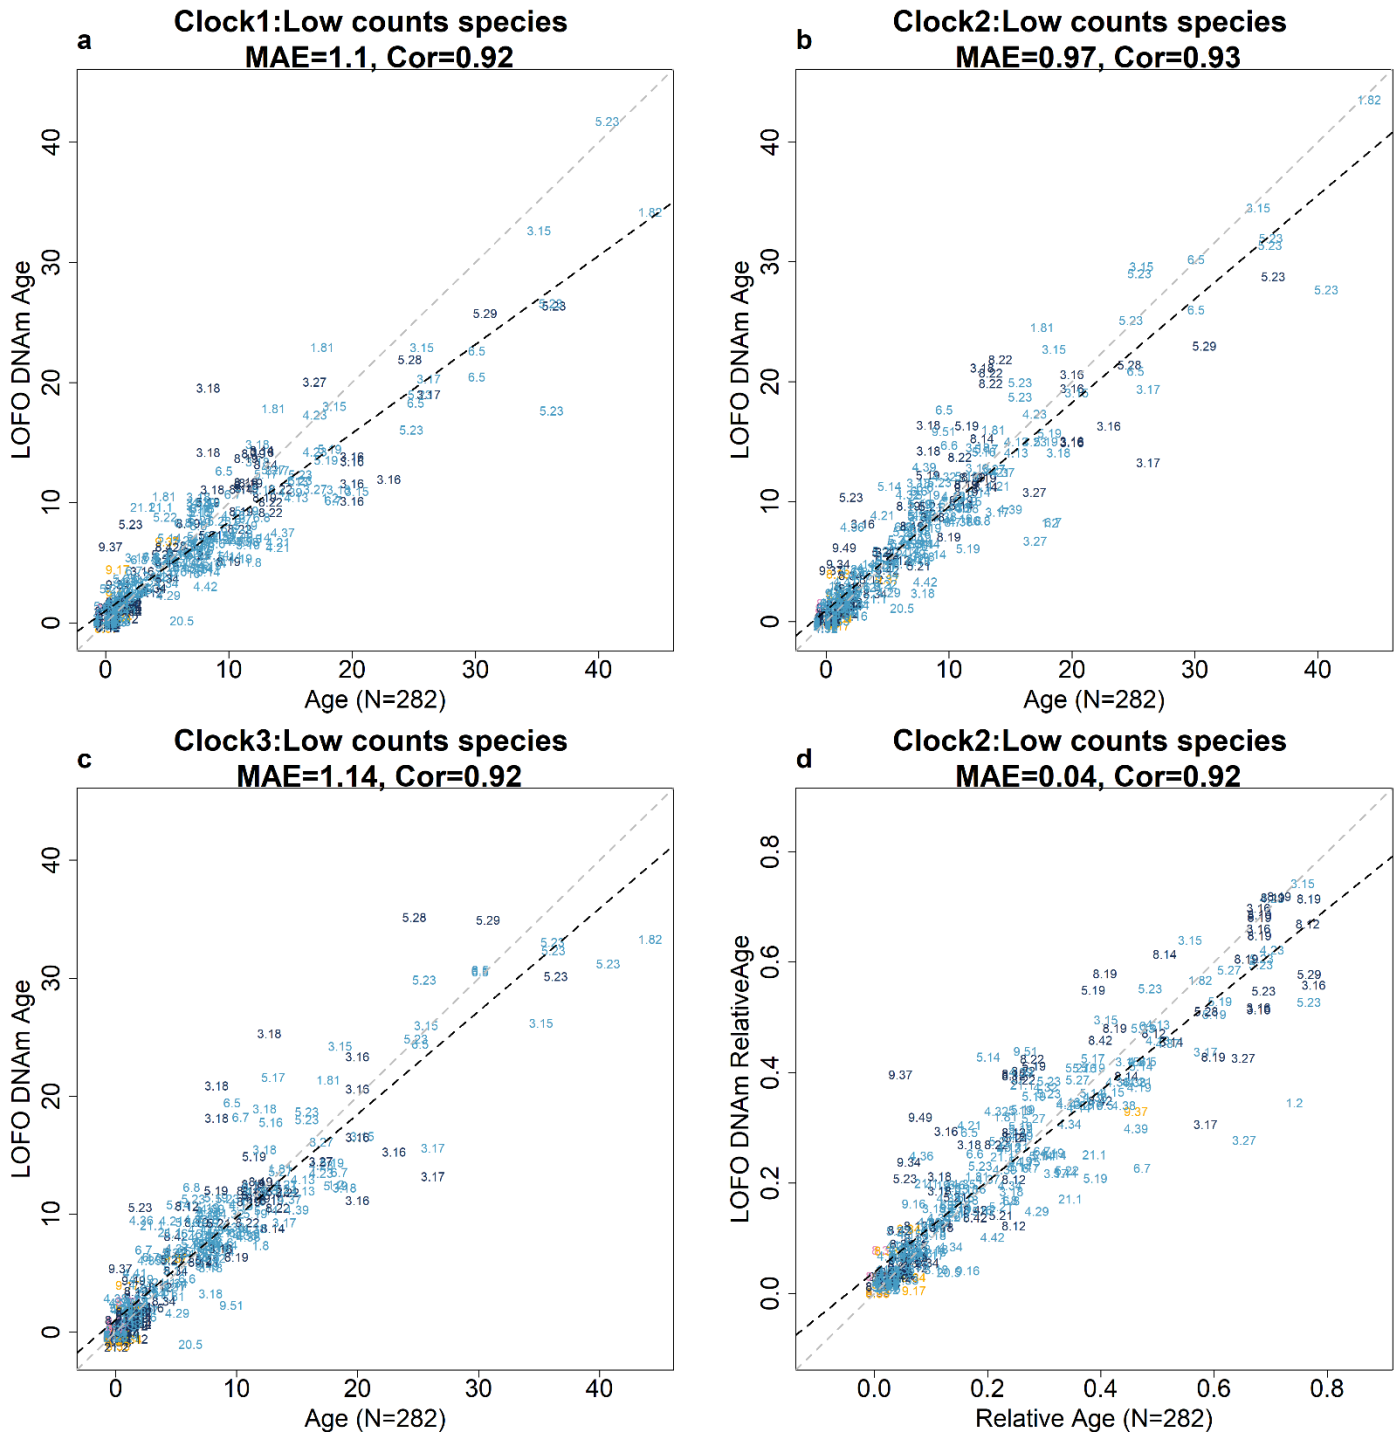

Supplement: Supplementary file [file media-1.pdf]
