# Supplementary material for: Universal DNA methylation age across mammalian tissues
Source: bioRxiv or medRxiv preprint supplement (doi:10.1101/2021.01.18.426733), 2022-09-05
Supplement: Supplementary file [file media-2.pdf]

## **Supplementary Material**

for the article entitled "Universal DNA methylation age estimators for mammalian tissues"

AT Lu *et al.*

## Supplementary Note

### Supplementary Note 1: Data description.

The combined data was generated by the Mammalian Methylation Consortium. The dataset is composed of individual data sets for different species that are described in separate articles <sup>1-15</sup>.

### Supplementary Note 2: Sensitivity analysis of enrichment results

It is critical to use a suitable background when it comes to any gene/pathway enrichment study. The wrong choice of background could easily lead to erroneous but highly significant associations due to hidden biases. When it comes to the mammalian array the choice of the proper background must reflect the following sources of bias. First, limited genome coverage provided by the 37k CpGs on the array. For example, the CpGs on the mammalian array cover 6871 human and 5659 mouse genes when each CpG is assigned uniquely to its closest gene neighbor. Second, by design, the mammalian array is biased toward highly conserved genomic regions. To address these biases, we evaluated the GREAT analysis software tool. As illustrated below, we find that GREAT analysis effectively deals with these biases and leads to biologically meaningful insights. In the following, we will report results from two different sensitivity analyses that were inspired by our GREAT enrichment analysis of the top 1 thousand age related CpGs (EWAS of age). Our first sensitivity analysis involved a random set of 1000 CpG mammalian CpGs. In essence, this evaluates the null hypothesis of no relationship between chronological age and methylation. The most significant (nominal) enrichment p value was  $p=3.9 \times 10^{-4}$ . Note that this p-value is far less significant than the enrichment p values for age-related CpGs in our article: top 1k negative CpGs lead to  $p=2.7 \times 10^{-8}$ ; top 1k positive age-related CpGs lead to  $p=2.7 \times 10^{-266}$ . We repeated this analysis with several sets of random 1k CpGs and obtained similar results.

Second, we also evaluated the enrichment of the top 1087 most highly conserved CpGs across 158 mammalian genomes. This sensitivity analysis addresses the concern that highly conserved CpGs could have an increased chance of correlating strongly with chronological age or, conversely, non-conserved (noise) CpGs are expected to have no signal for age and will therefore not be selected in an EWAS of age. This hidden bias would manifest itself as follows: the enrichment analysis of our meta analysis EWAS for age would be equivalent to the EWAS

of highly conserved CpGs. In the following, we provide details that demonstrate that this is not the case. This biologically meaningful set of 1087 highly conserved CpGs led to highly significant enrichment p-values for gene sets involved in RNA processing, and RNA splicing, and lipoprotein particle biosynthesis. Some of the top gene families of these conserved probes include RBM and LDLR. For example, for ontology class "MSigDB Cancer Neighborhood" we find  $p=5.2 \times 10^{-19}$  for "Neighborhood of SMC1L1",  $p=2.67 \times 10^{-18}$  for "Neighborhood of TDG",  $p=1.57 \times 10^{-16}$  for "Neighborhood of XRCC5". Highly significant GO Biological Processes include RNA processing ( $p=1.56 \times 10^{-17}$ ), RNA binding ( $p=5.90 \times 10^{-16}$ ), mRNA processing ( $p=1.15 \times 10^{-14}$ ), and RNA splicing ( $p=3.9 \times 10^{-11}$ ). However, these enrichments are quite distinct from those observed for the EWAS of age. RNA splicing and processing only showed a weak significance ( $p = 0.05$  to  $1.4 \times 10^{-3}$ ) in hypomethylated age-related CpGs. In summary, we did not observe any overlap between the top enrichment terms for the age-related CpGs with those from highly conserved regions (or those from a random set of CpGs). A detailed enrichment analysis of all the CpGs on the mammalian array can be found in <sup>1</sup>.

GREAT was not explicitly designed to adjust for the issue of certain CpG's having more power to detect association based on working in more species, but it appears not to be driving categories of enrichment for age. Overall, our sensitivity analysis of the enrichment study demonstrates that GREAT analysis adjusted for potential biases arising from the design of the mammalian array and protected us against spurious associations.

### **Supplementary Note 3: Enrichment analysis for overlap between EWAS of mammalian age associated genes and large-scale GWAS associated ages of complex traits**

We investigate the overlap genomic regions using our EWAS results for age (all tissues and stratified by tissue types) and a total of 69 large-scale GWAS studies for anthropometric traits, behavioral phenotypes, cognitive related traits, inflammatory diseases, lipid panel outcomes, metabolic outcomes and diseases, neurodegenerative and neuropsychiatric disorders, longevity, reproductive aging and other age related phenotypes including DNA methylation based biomarkers. The GWAS results are corresponding to previously published large-scale studies. For instance, GWAS of anthropometric traits are based on the studies conducted by the GIANT consortium,

[https://portals.broadinstitute.org/collaboration/giant/index.php/GIANT\\_consortium](https://portals.broadinstitute.org/collaboration/giant/index.php/GIANT_consortium). The GWAS articles are

summarized below.

| Index | Hg   | Category                        | Trait                                  | Ethnicity | Sex | PMID     |
|-------|------|---------------------------------|----------------------------------------|-----------|-----|----------|
| 1     | hg19 | Neurodegenerative disorder      | Age-related Macular degeneration (AMD) | EUR+ASN   | All | 23455636 |
| 2     | hg19 | Neurodegenerative disorder      | AMD Geographic Atrophy                 | EUR+ASN   | All | 23455636 |
| 3     | hg19 | Neurodegenerative disorder      | AMD Neovascular                        | EUR+ASN   | All | 23455636 |
| 4     | hg19 | Neurodegenerative disorder      | Alzheimer's disease                    | EUR       | All | 24162737 |
| 5     | hg18 | Longevity                       | Longevity > 90                         | EUR       | All | 24688116 |
| 6     | hg18 | Longevity                       | Longevity > 85                         | EUR       | All | 24688116 |
| 7     | hg19 | Neurodegenerative disorder      | Parkinson's disease                    | EUR       | All | 19915575 |
| 8     | hg19 | Neuropsychiatric disorder       | Schizophrenia                          | All       | All | 25056061 |
| 9     | hg19 | Inflammatory diseases           | IBD                                    | EUR       | All | 26192919 |
| 10    | hg19 | Inflammatory diseases           | IBD Crohn's disease                    | EUR       | All | 26192919 |
| 11    | hg19 | Inflammatory diseases           | IBD Ulcerative colitis                 | EUR       | All | 26192919 |
| 12    | hg18 | Neuropsychiatric disorder       | Bipolar disorder                       | All       | All | 21926972 |
| 13    | hg18 | Neuropsychiatric disorder       | ADHD                                   | All       | All | 20732625 |
| 14    | hg18 | Neuropsychiatric disorder       | Major depression disorder              | EUR       | All | 22472876 |
| 15    | hg18 | Metabolic outcomes and diseases | Type 2 diabetes                        | EUR       | All | 22885922 |
| 16    | hg18 | Metabolic outcomes and diseases | Fasting glucose                        | EUR       | All | 22581228 |
| 17    | hg18 | Metabolic outcomes and diseases | Fasting insulin                        | EUR       | All | 22581228 |
| 18    | hg18 | GIANT Body fat distribution     | Hip AllAncestries                      | ALL       | M&F | 25673412 |
| 19    | hg18 | GIANT Body fat distribution     | Hip EUR                                | EUR       | M&F | 25673412 |
| 20    | hg18 | GIANT Body fat distribution     | Hip AllAncestries(Males)               | ALL       | M   | 25673412 |
| 21    | hg18 | GIANT Body fat distribution     | Hip EUR (Males)                        | EUR       | M   | 25673412 |

|    |      |                             |                                            |     |     |          |
|----|------|-----------------------------|--------------------------------------------|-----|-----|----------|
| 22 | hg18 | GIANT Body fat distribution | Hip AllAncestries(Females)                 | ALL | F   | 25673412 |
| 23 | hg18 | GIANT Body fat distribution | Hip EUR (Females)                          | EUR | F   | 25673412 |
| 30 | hg18 | GIANT Body fat distribution | Waist circumference AllAncestries          | ALL | M&F | 25673412 |
| 31 | hg18 | GIANT Body fat distribution | Waist circumference EUR                    | EUR | M&F | 25673412 |
| 32 | hg18 | GIANT Body fat distribution | Waist circumference AllAncestries(Males)   | ALL | M   | 25673412 |
| 33 | hg18 | GIANT Body fat distribution | Waist circumference EUR (Males)            | EUR | M   | 25673412 |
| 34 | hg18 | GIANT Body fat distribution | Waist circumference AllAncestries(Females) | ALL | F   | 25673412 |
| 35 | hg18 | GIANT Body fat distribution | Waist circumference EUR (Females)          | EUR | F   | 25673412 |
| 42 | hg18 | GIANT Body fat distribution | Waist to hip ratio AllAncestries           | ALL | M&F | 25673412 |
| 43 | hg18 | GIANT Body fat distribution | Waist to hip ratio EUR                     | EUR | M&F | 25673412 |
| 44 | hg18 | GIANT Body fat distribution | Waist to hip ratio AllAncestries(Males)    | ALL | M   | 25673412 |
| 45 | hg18 | GIANT Body fat distribution | Waist to hip ratio EUR (Males)             | EUR | M   | 25673412 |
| 46 | hg18 | GIANT Body fat distribution | Waist to hip ratio AllAncestries(Females)  | ALL | F   | 25673412 |
| 47 | hg18 | GIANT Body fat distribution | Waist to hip ratio EUR (Females)           | EUR | F   | 25673412 |
| 54 | hg18 | GIANT BMI & Height          | BMI                                        | EUR | All | 25673413 |
| 55 | hg18 | GIANT BMI & Height          | Height                                     | EUR | All | 20881960 |
| 56 | hg19 | Neurodegenerative disorder  | Frontotemporal dementia                    | EUR | All | 24943344 |
| 57 | hg19 | Neurodegenerative disorder  | FTD Behavioral variant                     | EUR | All | 24943344 |
| 58 | hg19 | Neurodegenerative disorder  | FTD with motor neuron disease              | EUR | All | 24943344 |
| 59 | hg19 | Neurodegenerative disorder  | FTD progressive non-fluent aphasia         | EUR | All | 24943344 |
| 60 | hg19 | Neurodegenerative disorder  | FTD semantic dementia                      | EUR | All | 24943344 |
| 61 | hg19 | Neurodegenerative disorder  | Huntington's disease age onset             | EUR | All | 26232222 |
| 62 | hg19 | Behavioral phenotype        | Educational attainment                     | EUR | All | 27225129 |
| 63 | hg19 | Behavioral phenotype        | Educational attainment (Males)             | EUR | All | 27225129 |

|    |      |                            |                                  |         |     |          |
|----|------|----------------------------|----------------------------------|---------|-----|----------|
| 64 | hg19 | Behavioral phenotype       | Educational attainment (Females) | EUR     | All | 27225129 |
| 65 | hg18 | Reproductive aging         | Age at menarche                  | EUR     | All | 25231870 |
| 66 | hg18 | Reproductive aging         | Age at menopause                 | EUR     | All | 26414677 |
| 67 | hg18 | Lipid panel outcomes       | HDL                              |         | All | 24097068 |
| 68 | hg18 | Lipid panel outcomes       | LDL                              |         | All | 24097068 |
| 69 | hg18 | Lipid panel outcomes       | Total cholesterol                |         | All | 24097068 |
| 70 | hg18 | Lipid panel outcomes       | Triglyceride                     |         | All | 24097068 |
| 71 | hg18 | Reproductive aging         | Leukocyte telomere length        | EUR     | All | 23535734 |
| 72 | hg19 | DNAm biomarkers            | AgeAccelGrim EUR                 | EUR     | All |          |
| 73 | hg19 | DNAm biomarkers            | DNAmGranAdjustedAge EUR          | EUR     | All |          |
| 74 | hg19 | DNAm biomarkers            | AgeAccelHannum EUR               | EUR     | All |          |
| 75 | hg19 | DNAm biomarkers            | DNAmPAI1AdjAge EUR               | EUR     | All |          |
| 76 | hg19 | DNAm biomarkers            | IEAA EUR                         | EUR     | All |          |
| 77 | hg19 | DNAm biomarkers            | AgeaccelPhenoAge EUR             | EUR     | All |          |
| 78 | hg19 | DNAm biomarkers            | AgeAccelGrim AFR                 | AFR     | All |          |
| 79 | hg19 | DNAm biomarkers            | DNAmGranAdjustedAge AFR          | AFR     | All |          |
| 80 | hg19 | DNAm biomarkers            | AgeAccelHannum AFR               | AFR     | All |          |
| 81 | hg19 | DNAm biomarkers            | DNAmPAI1AdjAge AFR               | AFR     | All |          |
| 82 | hg19 | DNAm biomarkers            | IEAA AFR                         | AFR     | All |          |
| 83 | hg19 | DNAm biomarkers            | AgeaccelPhenoAge AFR             | AFR     | All |          |
| 84 | hg19 | DNAm biomarkers            | AgeAccelGrim All                 | EUR+AFR | All |          |
| 85 | hg19 | DNAm biomarkers            | DNAmGranAdjustedAge All          | EUR+AFR | All |          |
| 86 | hg19 | DNAm biomarkers            | AgeAccelHannum All               | EUR+AFR | All |          |
| 87 | hg19 | DNAm biomarkers            | DNAmPAI1AdjAge All               | EUR+AFR | All |          |
| 88 | hg19 | DNAm biomarkers            | IEAA All                         | EUR+AFR | All |          |
| 89 | hg19 | DNAm biomarkers            | AgeaccelPhenoAge All             | EUR+AFR | All |          |
| 90 | hg19 | Longevity                  | Father's attained age            | EUR     | All | 29227965 |
| 91 | hg19 | Longevity                  | Mother's attained age            | EUR     | All | 29227965 |
| 92 | hg19 | Longevity                  | Parental attained age            | EUR     | All | 29227965 |
| 93 | hg19 | Age related phenotype      | Atrial fibrillation              | EUR     | All | 30061737 |
| 94 | hg19 | Neurodegenerative disorder | Alzheimer's disease              | EUR     | All | 30617256 |
| 95 | hg19 | Cognitive related          | Intelligence                     | EUR     | All | 29942086 |
| 96 | hg19 | Reproductive aging         | AgeAtMenarche                    | EUR     | All | 28436984 |

|                                                                                                                                                                                                                                                           |      |                            |                                        |     |     |          |
|-----------------------------------------------------------------------------------------------------------------------------------------------------------------------------------------------------------------------------------------------------------|------|----------------------------|----------------------------------------|-----|-----|----------|
| 97                                                                                                                                                                                                                                                        | hg19 | Neurodegenerative disorder | Huntington's disease motor progression | EUR | All | 28642124 |
| <p>EUR: Europeans; AFR: Africans; ASN: Asians.<br/>         GWAS resulted in index 72-89 are published in<br/> <a href="https://www.biorxiv.org/content/10.1101/2020.06.29.133702v1">https://www.biorxiv.org/content/10.1101/2020.06.29.133702v1</a>.</p> |      |                            |                                        |     |     |          |

## References

1. Arneson, A. *et al.* A mammalian methylation array for profiling methylation levels at conserved sequences. *bioRxiv*, 2021.01.07.425637 (2021).
2. Bors, E.K. *et al.* An epigenetic clock to estimate the age of living beluga whales. *bioRxiv*, 2020.09.28.317610 (2020).
3. Horvath, S. *et al.* DNA methylation study of age and sex in baboons and four other primates. *bioRxiv*, 2020.11.29.402891 (2020).
4. Horvath, S. *et al.* Reversing age: dual species measurement of epigenetic age with a single clock. *bioRxiv*, 2020.05.07.082917 (2020).
5. Horvath, S. *et al.* Epigenetic clock and methylation studies in the rhesus macaque. *bioRxiv*, 2020.09.21.307108 (2020).
6. Horvath, S. *et al.* DNA methylation age analysis of rapamycin in common marmosets. *bioRxiv*, 2020.11.21.392779 (2020).
7. Jasinska, A.J. *et al.* Epigenetic clock and methylation studies in vervet monkeys. *bioRxiv*, 2020.09.09.289801 (2020).
8. Kordowitzki, P. *et al.* Epigenetic clock and methylation study of oocytes from a bovine model of reproductive aging. *bioRxiv*, 2020.09.10.290056 (2020).
9. Lemaître, J.-F. *et al.* Epigenetic clock and DNA methylation studies of roe deer in the wild. *bioRxiv*, 2020.09.21.306613 (2020).
10. Prado, N.A. *et al.* Epigenetic clock and methylation studies in elephants. *bioRxiv*, 2020.09.22.308882 (2020).
11. Raj, K. *et al.* Epigenetic clock and methylation studies in cats. *bioRxiv*, 2020.09.06.284877 (2020).
12. Sailer, L.L. *et al.* Pair bonding slows epigenetic aging and alters methylation in brains of prairie voles. *bioRxiv*, 2020.09.25.313775 (2020).
13. Schachtschneider, K.M. *et al.* Epigenetic clock and DNA methylation analysis of porcine models of aging and obesity. *bioRxiv*, 2020.09.29.319509 (2020).
14. Sugrue, V. *et al.* Castration delays epigenetic aging and feminises DNA methylation at androgen-regulated loci. *bioRxiv*, 2020.11.16.385369 (2020).
15. Wilkinson, G.S. *et al.* Genome Methylation Predicts Age and Longevity of Bats. *bioRxiv*, 2020.09.04.283655 (2021).
